# Supplementary material for: A simple and rapid method for optical visualization and quantification of bacteria on textiles
Source: PubMed Central journal article supplement (PMC5177907; doi:10.1038/srep39635), 2016-12-22
Supplement: srep39635-s1.pdf [file srep39635-s1.pdf]

# A simple and rapid method for optical visualization and quantification of bacteria on textiles

Philipp Stiefel<sup>1</sup>, Jana Schneider<sup>1</sup>, Caroline Amberg<sup>2</sup>, Katharina Maniura-Weber<sup>1</sup>, Qun Ren<sup>1\*</sup>

<sup>1</sup> Laboratory for Biointerfaces, Empa, Swiss Federal Laboratories for Materials Science and Technology, Lerchenfeldstrasse 5, CH-9014 St. Gallen, Switzerland

<sup>2</sup> Swisstat Testmaterialien AG, Mövenstrasse 12, CH-9015 St. Gallen, Switzerland

\* Corresponding author

E-mail: qun.ren@empa.ch

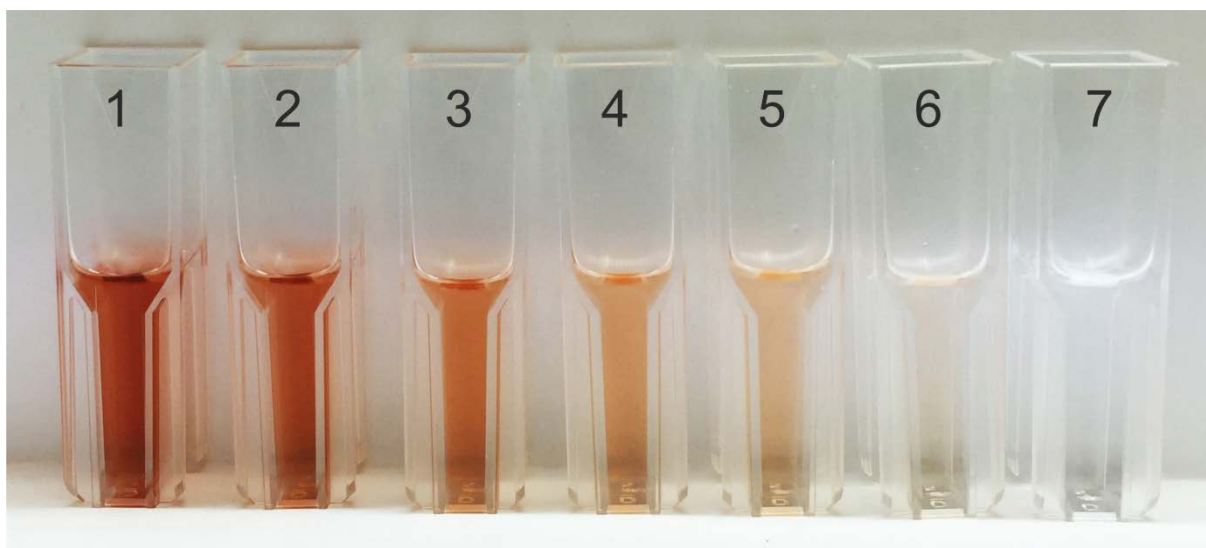

**Figure S1: Eluted dye in cuvette.** Dye eluted from textiles stained with INT after incubation with different numbers of bacteria (1-5) and medium w/o bacteria (6). DMSO blank (7) is also displayed.
